# Supplementary material for: Differential amplicons (ΔAmp)—a new molecular method to assess RNA integrity
Source: PubMed Central journal article supplement — Biomol Detect Quantif. 2015 Sep 26;6:4–12. doi: 10.1016/j.bdq.2015.09.002 (PMC4822209; doi:10.1016/j.bdq.2015.09.002), 2015-09-26
Supplement: mmc2.pdf [file mmc2.pdf]

# Supplementary material 2

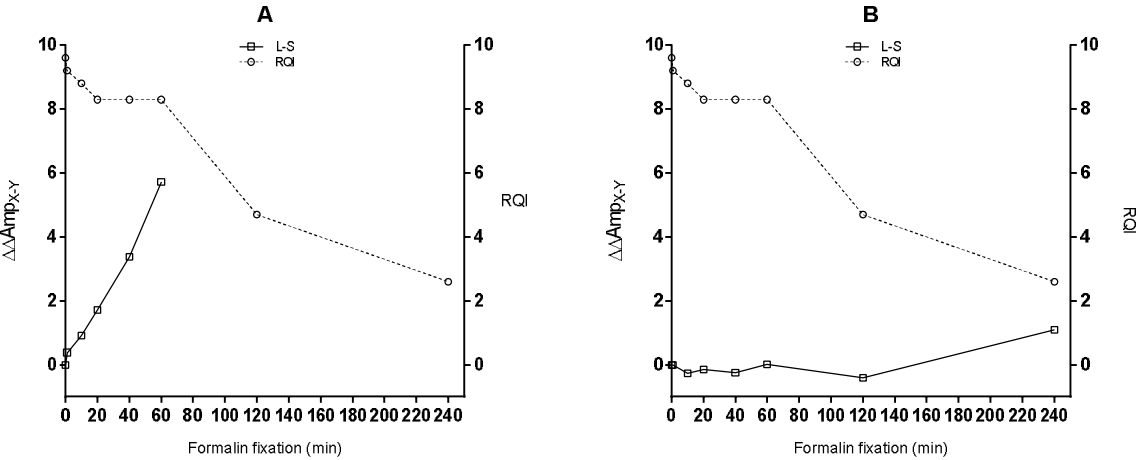

Figure 1. RQI and  $\Delta\Delta\text{Amp}_{x-y}$  for B2M (A) and ERR marker (B) as function of the time exposed to formalin

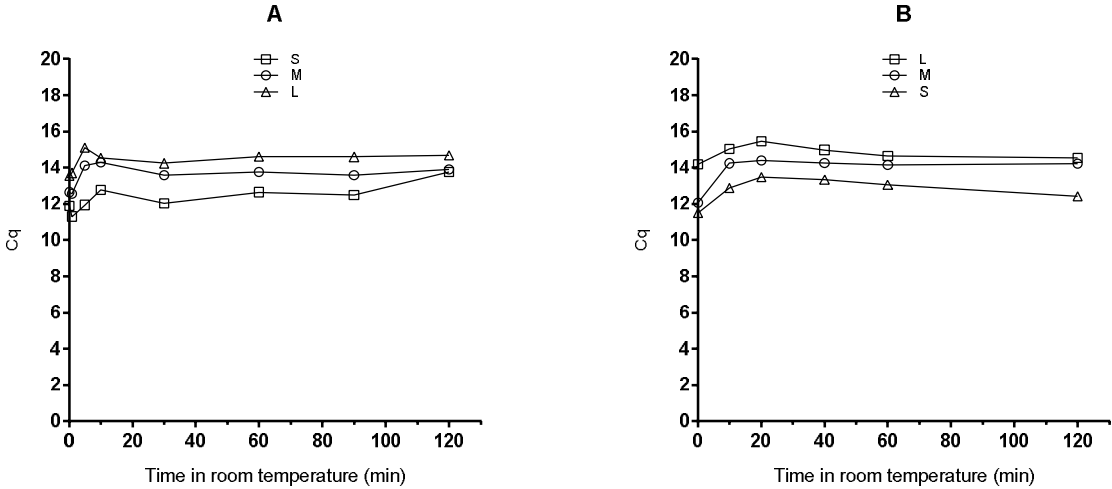

Figure 2. Room temperature incubated frozen mouse liver tissue. Ct of long, medium and short amplicons targeting the ERR-marker plotted against time in room temperature for tissue powder (A) and pieces (B).
