# Supplementary material for: Differential amplicons (ΔAmp)—a new molecular method to assess RNA integrity
Source: PubMed Central journal article supplement — Biomol Detect Quantif. 2015 Sep 26;6:4–12. doi: 10.1016/j.bdq.2015.09.002 (PMC4822209; doi:10.1016/j.bdq.2015.09.002), 2015-09-26

## Supplementary Material 3

Figure 1

Purified human RNA exposed to UV radiation. RIN plotted against incubation time and gel picture of all time points.

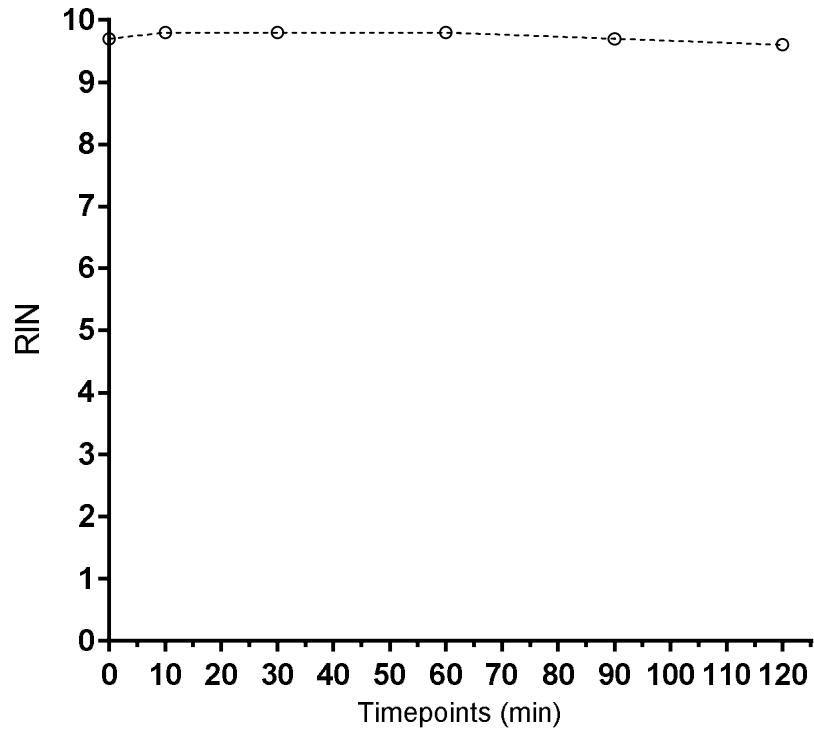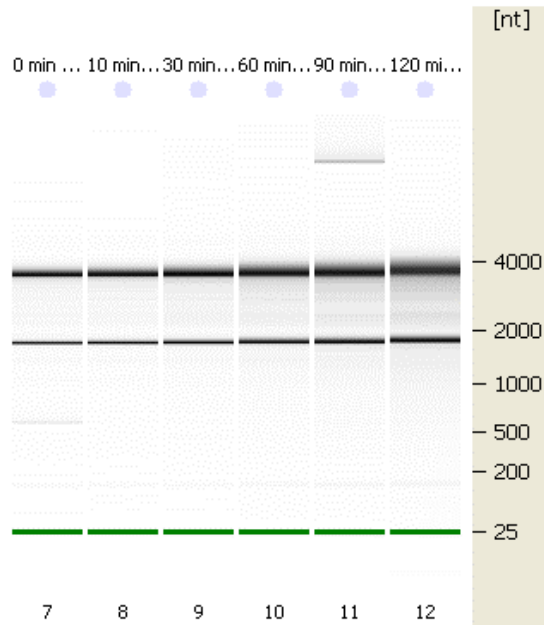

Figure 2

Purified human RNA exposed to UV radiation. RQI plotted against  $\Delta\Delta\text{Amp}_{\text{ERR}}$  for B2M (A), ERR marker (B) and 18S (C). Exposure time plotted against  $\Delta\Delta\text{Amp}_{\text{ERR}}$  for B2M (D), ERR marker (E) and 18S (F).

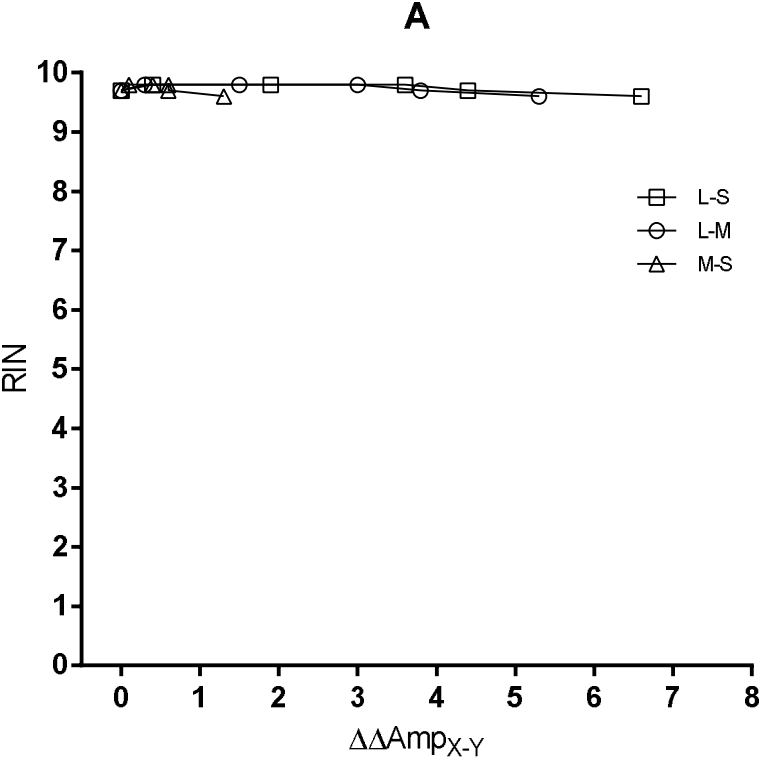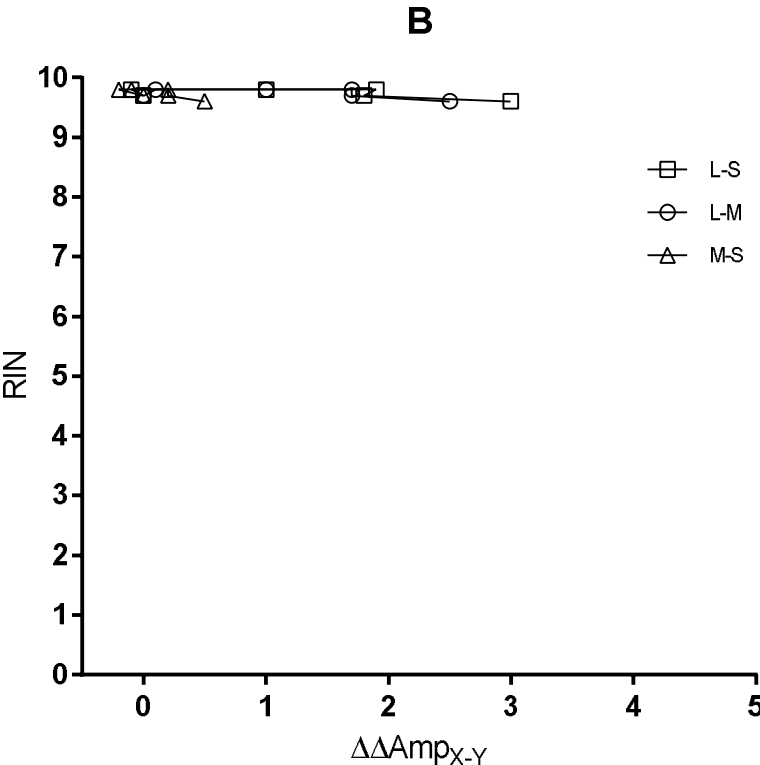

**C**

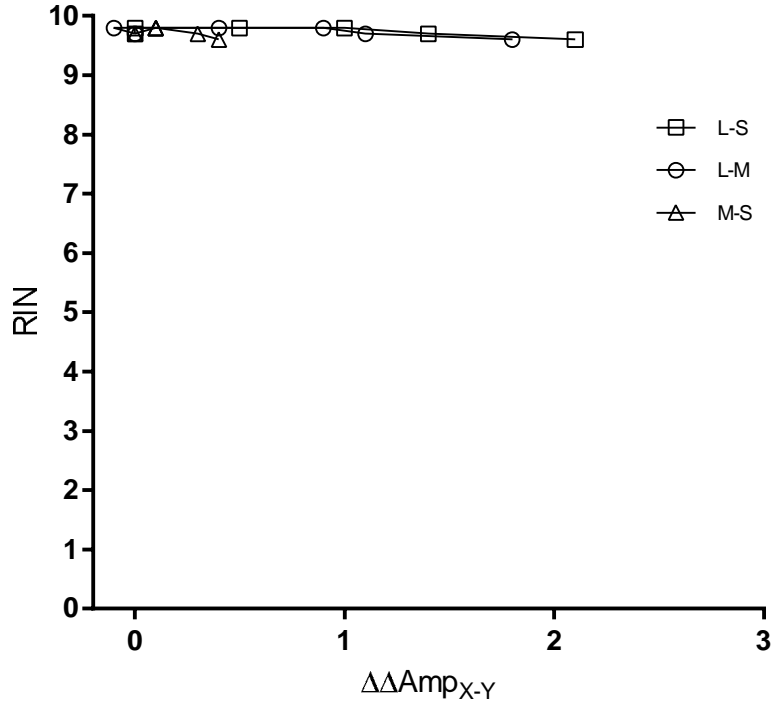

**D**

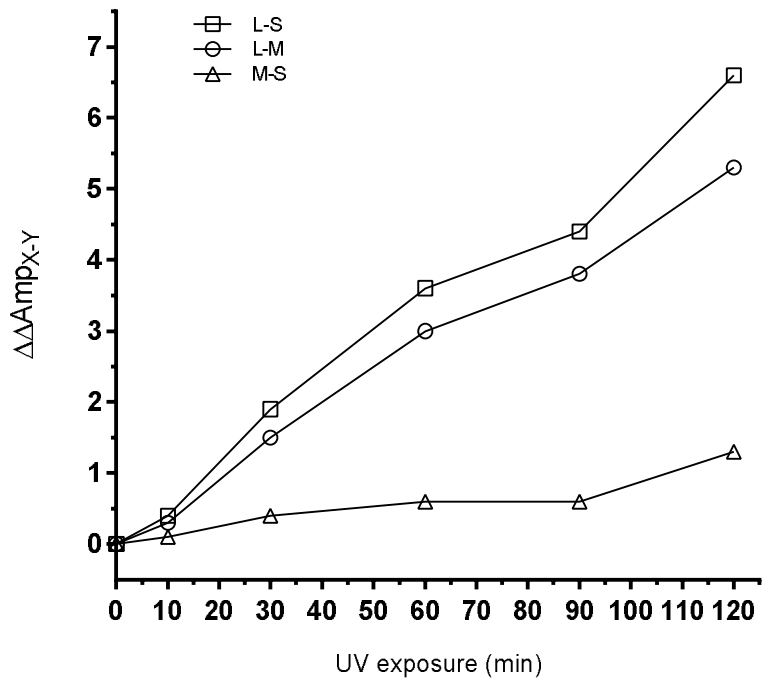

**E**

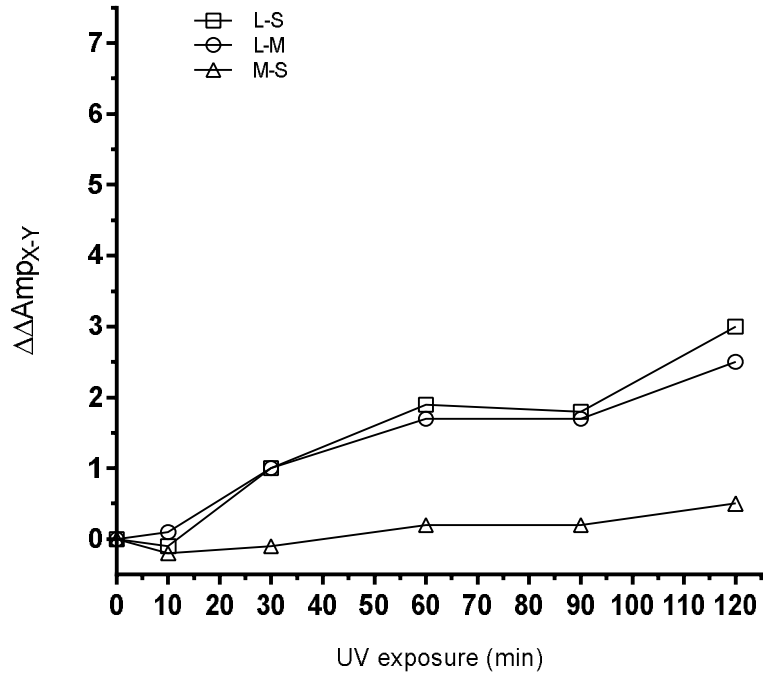

**F**

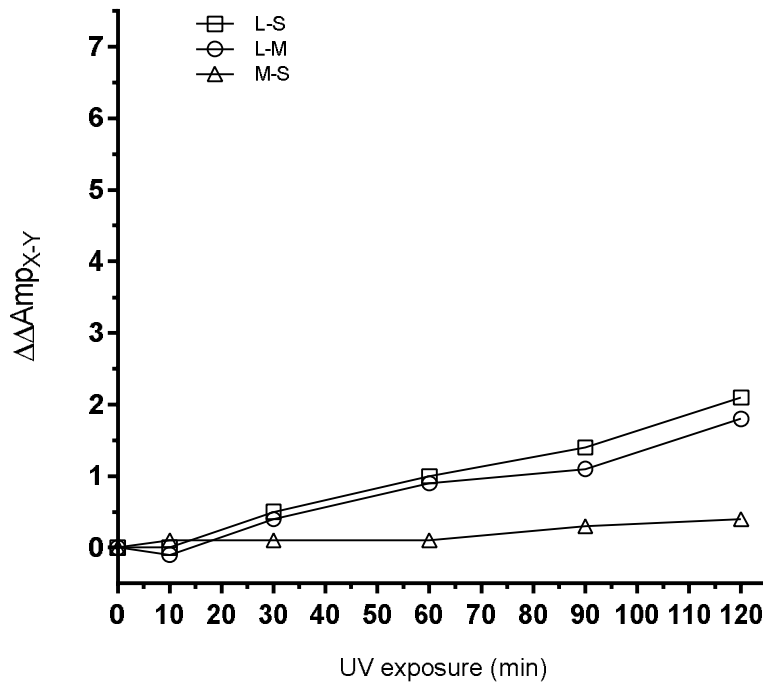

Figure 3

Purified human RNA exposed to high intensity UV radiation. RIN plotted against incubation time, gel picture of all time points and  $\Delta\Delta\text{Amp}_{\text{ERR}}$  for B2M.

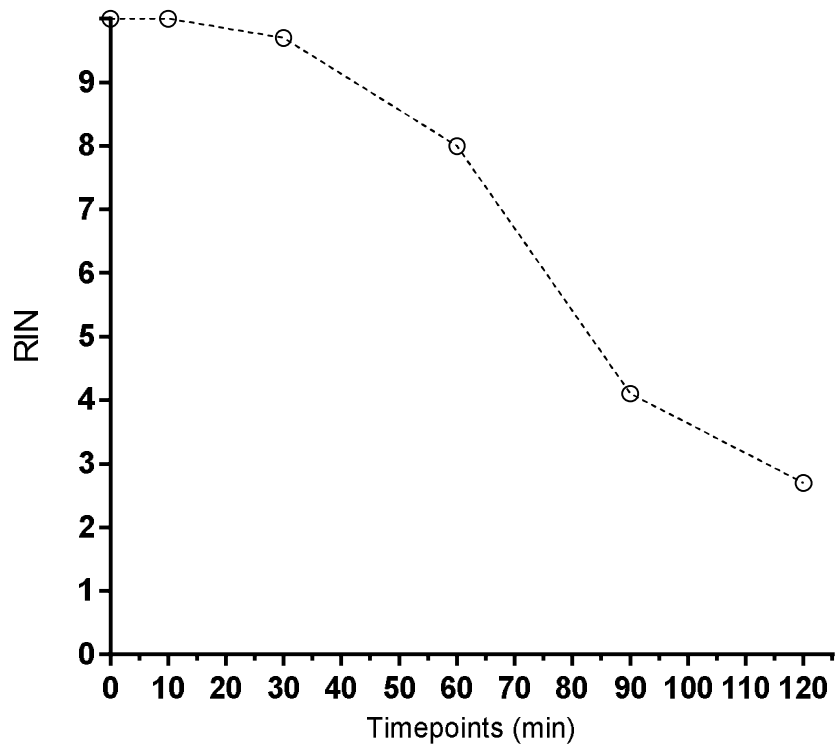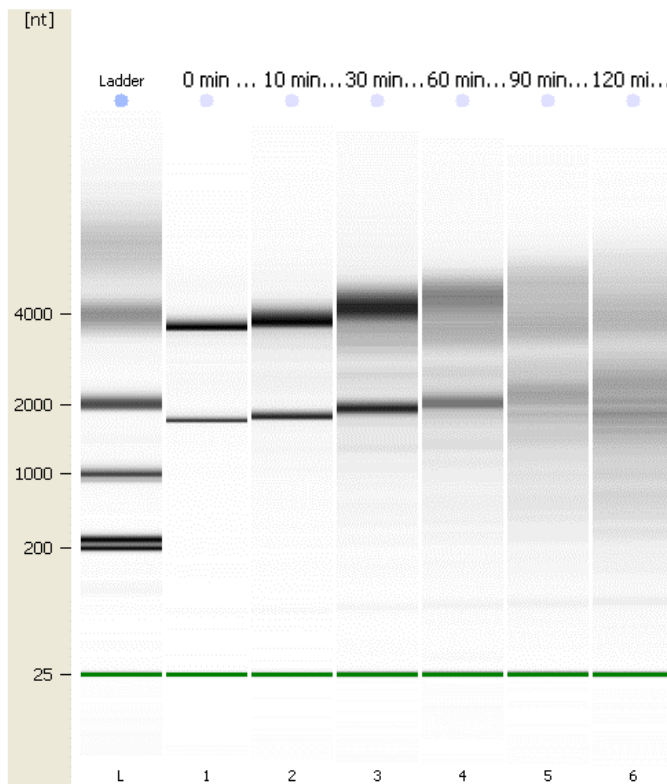

### High intensity UV exposure (B2M)

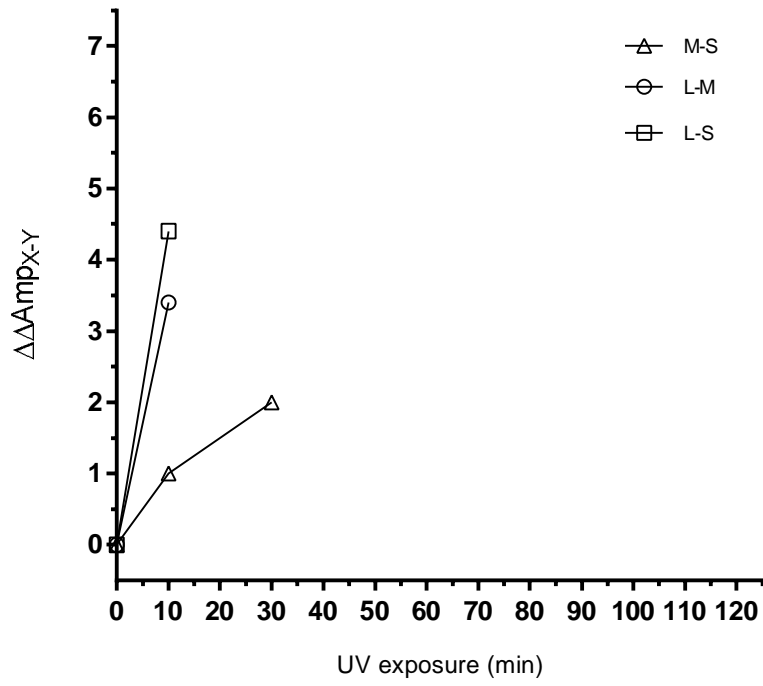

Supplement: mmc3.pdf [file mmc3.pdf]
